# ganon: precise metagenomics classification against large and up-to-date sets of reference sequences

Vitor C. Piro<sup>\*1,2</sup>, Temesgen H. Dadi<sup>3</sup>, Enrico Seiler<sup>3</sup>, Knut Reinert<sup>3</sup> and Bernhard Y. Renard<sup>†1</sup>

<sup>1</sup>Bioinformatics Unit (MF1), Robert Koch Institute, Nordufer 20, 13353 Berlin, Germany

<sup>2</sup>CAPES Foundation, Ministry of Education of Brazil, 70040-020, Brasília, DF, Brazil

<sup>3</sup>Department of Mathematics and Computer Science, Freie Universität Berlin, Takustr. 9, 14195 Berlin, Germany

## Abstract

The exponential growth of assembled genome sequences greatly benefits metagenomics studies, providing a broader catalog of reference organisms on a variety of environments. However, currently available methods struggle to manage the increasing amount of sequences and their frequent updates. Indexing the current RefSeq is no longer possible on standard infrastructures and it can take days and hundreds of GB of memory on large servers. Few methods address these issues thus far, and even though many can theoretically handle large amounts of references, time/memory requirements are prohibitive in practice. As a result, many studies that require sequence classification use the available tools in conjunction with often outdated and almost never truly up-to-date indices. This also means that the taxonomic composition of the reference database is not being adjusted based on the study performed. These factors can lead to unnecessary performance problems in the sequence classification. Motivated by those limitations we created ganon, a k-mer based read classification tool that uses Interleaved Bloom Filters in conjunction with a taxonomic clustering and a k-mer counting/filtering scheme. Ganon provides an efficient method for indexing references, keeping them updated. It requires less than 55 minutes to index the complete RefSeq of bacteria, archaea, fungi and viruses. The tool can further keep these indices up-to-date in a fraction of the time necessary to create them, allowing researchers to always work with the most recent references. Ganon makes it possible to query against very large reference sets and therefore it classifies significantly more reads and identifies more species than similar methods. When classifying a high-complexity real dataset from the CAMI challenge against complete genomes from RefSeq, ganon shows strongly increased precision while exhibiting equal or better sensitivity compared with state-of-the-art tools. When classifying the same dataset against the complete RefSeq, ganon improved the F1-Score by 65% at the genus level. Ganon supports taxonomy- and assembly-level classification as well as multiple indices and hierarchical classification. The software is open-source and available at: [https://gitlab.com/rki\\_bioinformatics/ganon](https://gitlab.com/rki_bioinformatics/ganon)

## 1 Introduction

Reference- and taxonomy-based short read classification is a fundamental task in metagenomics. Defining the origin of each read from an environmental sample, which can be done during [1] or after sequencing, is usually the first step prior to abundance estimation, profiling and assembly. Over the last years many tools have been specifically developed for this task [2, 3, 4, 5, 6] with different strategies to achieve good performance classifying a large amount of short reads against a predefined and static set of reference sequences. Many of those approaches are taxonomy-based [7] and use this classification to better understand the composition of samples.

---

\*PiroV@rki.de

†RenardB@rki.de

45 The amount of complete or draft genomic sequences in public repositories is rapidly growing  
46 (Figure 1) due to advances in genome sequencing, improvements in read quality, length and cov-  
47 erage and also better algorithms for genome assembly. In addition, many partial and complete  
48 genome sequences come directly from metagenome-assembled genomes [8, 9, 10], a technique that  
49 boosts the growth of public repositories. This considerable amount of references poses a sizeable  
50 challenge for current tools that, in general, are not designed to deal with such amounts of data  
51 [11]. They also increase the already high computational cost of assigning millions of short reads  
52 to taxonomic targets.

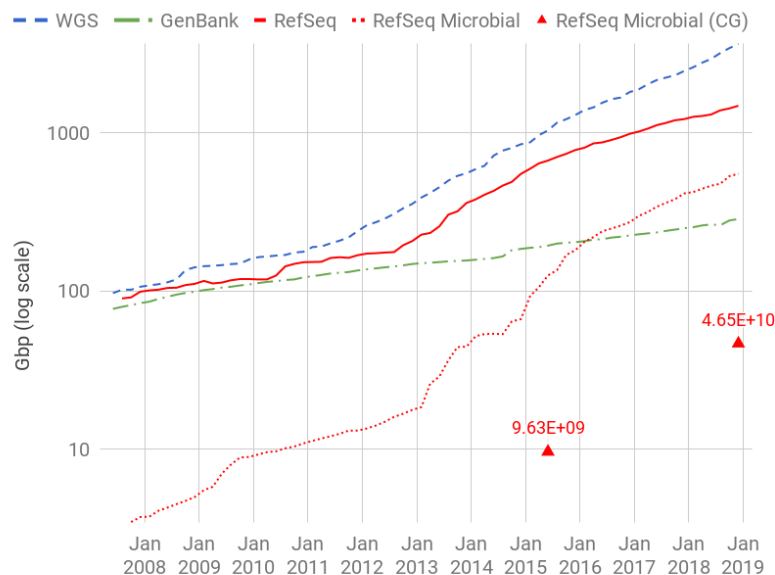

Figure 1: **Number of available sequences in NCBI repositories from June 2007 to December 2018 on a logarithmic scale.** Microbial stands for Archaeal and Bacterial organisms and CG stands for Complete Genomes. RefSeq Microbial has an uninterrupted and linear growth on a logarithmic scale. Data collected from: <https://ftp.ncbi.nlm.nih.gov/refseq/release/release-statistics/> and <https://www.ncbi.nlm.nih.gov/genbank/statistics/>

53 Figure 1 shows the amount of reference sequences available over the last 11 years in the Gen-  
54 Bank [12] and RefSeq [13] repositories from NCBI. The growth is exponential. RefSeq sequences  
55 from Archaeal and Bacterial genomes are highlighted for being a commonly used reference set for  
56 classification in metagenomics. Within an interval of two and a half years (from June 2015 to  
57 December 2018) the RefSeq Microbial of Complete Genomes (CG) grew more than four times,  
58 with 2.5 times more species represented in the most recent set (1529 to 3850). Looking at the same  
59 data point (end of 2018), the complete RefSeq Microbial has >12 times base pairs and >5 times  
60 species compared to the CG set. These data exemplify that databases are growing fast and the  
61 variation among them is significant. These repositories are becoming too big to be analyzed by  
62 standard hardware and if the observed growth continues, all this wealth of data will be constrained  
63 to just a few groups with resources available to process them.

64 The choice of the data to perform reference-based classification is an important step and a known  
65 issue in metagenomics [14]. As a rule of thumb, the more sequences the better the classification.  
66 But even complete sets of sequences are not evenly distributed throughout the taxonomic tree, such  
67 that different taxa are represented in different levels of quantity and quality. In addition, most  
68 of the taxa are still unknown and do not have any genomic sequence or entry in the taxonomic  
69 tree. This requires the tools to consistently remain up to date with the latest releases of public  
70 repositories, a task that is not trivial when dealing with very large amounts of sequences. Most of  
71 the tools lack the ability to update their own indices and databases, and currently many analyses  
72 are performed with outdated resources.

73 For example, the RefSeq Microbial repository from the beginning of 2018 is 10% less taxonomic  
74 diverse than it is today (mid. 2019). An even older RefSeq release from June 2015 lacks 27% of  
75 today's taxonomic diversity. Further, a commonly used subset of RefSeq, the microbial complete

76 genomes, covers only 15% of the available diversity of the full repository (December 2018). As  
77 an example, the latest release of kraken's [15] MiniKraken database (as of 18-Oct-2017) based  
78 on complete bacterial, archaeal, and viral genomes, although helpful to obtain fast insights on  
79 community composition, comprises only 11% of the total taxonomic diversity available on the  
80 latest RefSeq release from January 4th 2019. Metagenomics analyses based on those releases  
81 are prone to underperform and miss potential species of interest. **However, the use of outdated  
82 references or "pre-built" indices is still common practice [16]. Most methods are able to build  
83 custom databases but unable to update them. Weekly or daily updates with the most recent data  
84 are almost impossible given the time requirements to re-build those indices.**

85 The sequence classifiers MetaPhlAn [17] and Kaiju [18] created alternatives to cover most of  
86 the diversity contained in public sequence repositories by selecting a subset of marker genes and  
87 protein sequences, respectively. On one hand, those methods are very powerful, such that they  
88 provide fast and precise community profiles given their reduced index sizes. On the other hand,  
89 when analyzing whole genome sequences of complex environments, organisms with low abundance  
90 are easily missed due to their lack of complete genomic coverage. In addition, current methods  
91 using complete genome sequences struggle with the present amount of available data [11].

92 Given these limitations, we developed ganon, a new reference and taxonomy-based short read  
93 classification tool for metagenomics. Ganon uses Interleaved Bloom Filters (IBF) [19] to represent  
94 very large amounts of sequences into a searchable index. This enables the indexing of large sets of  
95 references (e.g. complete RefSeq) in faster time and with low memory consumption, consequently  
96 improving read classification for whole metagenomics sequencing experiments. Ganon also provides  
97 updatable indices, which can incorporate new released sequences in short time. The classification  
98 method, which is based on the k-mer counting lemma and a progressive filtering step, improves  
99 the precision of the classification without harming sensitivity when compared to state-of-the-art  
100 tools. Ganon was developed in C++ using the SeqAn library [20] and Python. The code is open  
101 source and freely available from: [https://gitlab.com/rki\\_bioinformatics/ganon](https://gitlab.com/rki_bioinformatics/ganon)

## 102 2 Methods

103 Ganon classifies reads against a set of reference sequences to find their exact or closest taxonomic  
104 origin. The method can also work in a further specialized level (e.g. assembly). **Clustering and  
105 indexing steps are necessary before classification, where the reference sequences will be grouped into  
106 taxonomic groups and processed into a searchable index.** Ganon indices store all k-mers present  
107 in the reference sequences into a specialized type of Bloom filter. Once the index is created, ganon  
108 classifies the reads based on the k-mer counting lemma together with a post-filtering step providing  
109 a unique or multiple classifications for each read. Multiple classifications are solved optionally with  
110 the lowest common ancestor (LCA) algorithm [21]. The following sections will further explain each  
111 of these steps in detail.

### 112 2.1 Indexing

113 Ganon indices are based on the k-mer content of the reference sequences, in other words, it uses  
114 all possible substrings of length  $k$  of the given sequences. Instead of using standard methods for  
115 k-mer storage, which can have high memory and space consumption when  $k$  is high ( $> 15$ ), we  
116 opted for Bloom filters [22], a space-efficient probabilistic data structure. Since the goal of the tool  
117 is to classify sequences based on their taxonomic origin, multiple Bloom filters would be necessary  
118 to represent each distinct group of sequences belonging to a certain taxonomic level (e.g. species).  
119 This approach provides a straightforward but impractical solution since it requires classification  
120 against multiple filters. This is solved by interleaving the Bloom filters, a technique previously  
121 described for the DREAM-Yara tool [19] and also part of the SeqAn library [20]. TaxSBP is used  
122 to separate sequences into taxonomic groups and to distribute them better into equal-sized clusters.

#### 123 2.1.1 TaxSBP

124 TaxSBP [<https://github.com/pirovc/taxsbp>] uses the NCBI Taxonomy database [23] to generate  
125 clusters of sequences that are close together in the taxonomic tree. It does this based on an imple-  
126 mentation of the approximation algorithm for the hierarchically structured bin packing problem  
127 [24]. As defined by Codenotti et al. this clustering method "[...] can be defined as the problem of

128 distributing hierarchically structured objects into different repositories in a way that the access to  
129 subsets of related objects involves as few repositories as possible”, where the objects are sequences  
130 assigned to taxonomic nodes of the taxonomic tree. Sequences are clustered together into groups  
131 limited by a maximum sequence length size of its components. Splitting sequences into smaller  
132 chunks with overlapping ends is supported. TaxSBP supports one level of specialization after the  
133 leaf nodes of the tree, making it possible to further cluster sequences by strain or assembly infor-  
134 mation that is not directly contained in the NCBI Taxonomy database (Figure 2 A). TaxSBP can  
135 also pre-cluster members of a certain taxonomic level, preventing them to be split among clusters.  
136 It can further generate clusters with exclusive ranks, which are guaranteed to be unique in their  
137 cluster. The tool was developed alongside the distributed indices concept [19] and supports the  
138 update of pre-generated clusters. Since TaxSBP uses the "pre-clustered" taxonomic tree informa-  
139 tion, the algorithm is very efficient and requires very few computational resources, thus having  
140 potential use in many other bioinformatics applications.

### 141 2.1.2 IBF

142 A Bloom filter is a probabilistic data structure that comprises a bit vector and a set of hash  
143 functions. Each of the functions maps a key value (k-mer in our application) to one of the bit  
144 positions in the vector. Collisions in the vector are possible, meaning that distinct k-mers can be  
145 set to the same bit positions in the vector. Those overlaps can be avoided with a larger bit vector,  
146 thus reducing the probability of false positives.

147 An Interleaved Bloom Filter (IBF) is a combination of several ( $b$ ) Bloom filters of the same  
148 size ( $n$ ) with the same hash functions into one bit vector (Figure 2 D). Each  $i$ -th bit of every  
149 Bloom filter is interleaved, resulting in a final IBF of size  $b * n$ . Querying in this data structure is  
150 possible by retrieving the sub-bit vectors for every hash function and merging them with a logical  
151 *AND* operation, which will result in a final bit vector indicating the membership for the query, as  
152 depicted in Figure 2 in the DREAM-Yara manuscript by [19].

153 Aiming at the classification based on taxonomic levels (e.g. species, genus, ...) or assembly  
154 level, TaxSBP is set to cluster the input sequences into exclusive groups (Figure 2 B). Every group  
155 will contain only sequences belonging to the same taxon or assembly unit, but the same unit can  
156 be split into several groups. Groups are limited by a predefined threshold of the sum of the base  
157 pair length of its elements and sequences can be sliced into smaller pieces to better generate equal  
158 sized clusters.

159 Each of those clusters will correspond to a single Bloom filter that is interleaved in a final IBF  
160 (Figure 2 C-D). Here a trade-off between the number of groups, their maximum size and the k-mer  
161 content of each group is important. The false positive rate of a Bloom filter depends mainly on its  
162 bit vector size and the number of inserted elements. In general, the more base pairs a particular  
163 cluster has, the higher the number of distinct k-mers. This requires the Bloom filter to be bigger  
164 in order to achieve low false positive rates when querying. In ganon indices, the group with the  
165 most unique k-mers will define the size and the maximum false positive rate of the final IBF since  
166 all groups have to be equal-sized by definition. Thus the previous clustering step is crucial to  
167 achieve a good trade-off between the number of groups, their sizes and k-mer content. The lower  
168 the taxonomic level, the more fragmented the clusters. For example: if a reference set has 2000  
169 species groups, there will be at least the same number of clusters when building at the species  
170 level. The higher the taxonomic level, the fewer the number of clusters, since they can be grouped  
171 together, thereby producing smaller filters. This trade-off and parameterization is automatically  
172 calculated by ganon, with a single option to define the maximum memory available to build an  
173 index.

174 The IBF has an inherent capability of updating since it is fragmented into many sub-parts.  
175 Adding new sequences to a previously generated IBF is as easy as setting the bit positions of the  
176 k-mers from the new sequences to their known clusters or appending new clusters to the existing  
177 filter. To remove sequences from the IBF, all bit positions of the updated cluster are set to zero  
178 and the cluster is re-created from the updated content.

179 The IBF is the main data structure for ganon indices to perform alignment-free classification  
180 while DREAM-Yara, the tool that originally proposed the IBF, is a read mapper that uses the  
181 same data structure to filter reads to further perform distributed alignment. At the end of the  
182 building process, the ganon index will consist of an IBF based on a maximum classification level  
183 chosen (taxonomic rank or assembly) and auxiliary files for the classification step.

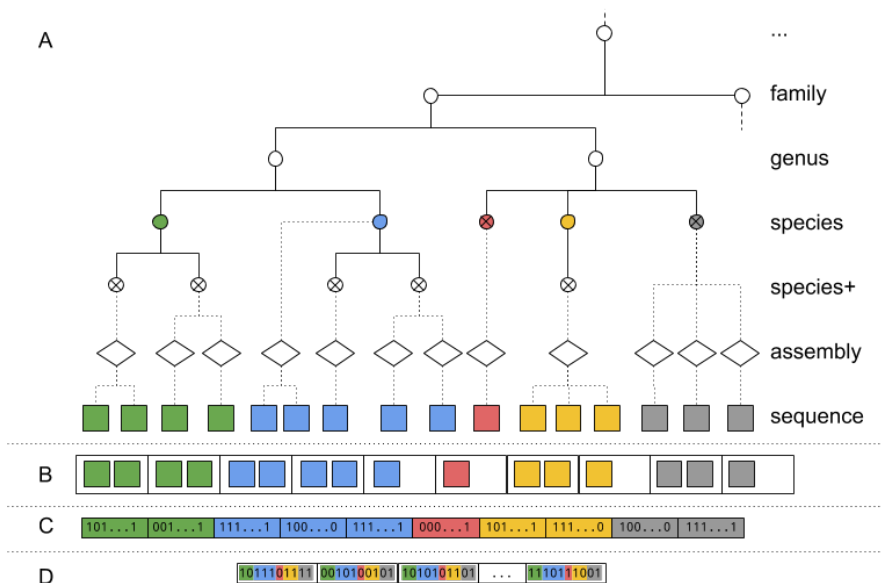

Figure 2: **Classification levels, taxonomic distribution and Interleaved Bloom Filter**  
 A) Empty circles are inner nodes of the tree; circles marked with an "x" are leaf nodes (also referenced in this manuscript as "taxid" nodes); full lines represent taxonomic relations, dotted lines represent the extension of the taxonomic classification to the assembly and sequence level. Species+ represents all taxonomic groups that are more specific than species with species in the lineage (e.g. subspecies, species group, no rank). B) A toy example of sequences clustered by species into equal-sized groups, performed by TaxSBP C) Sequences are fragmented into k-mers and with a given number of hash functions, those k-mers are inserted into equal-sized bit-vectors (Bloom Filters) D) The Interleaved Bloom Filter, representing the previously generated bit-vectors with each bit interleaved.

## 184 2.2 Classifying

185 The read classification is based on the well-studied k-mer counting lemma [25, 26]. All k-mers  
 186 from given reads are looked up on the indices previously generated. If a minimum number of  
 187 matches between the read and the reference is achieved, a read is considered classified. Based on  
 188 incremental error rates, multiple classifications for each read are filtered out and only the best ones  
 189 are selected. When the filtering cannot define a single origin for a read, an optional LCA step is  
 190 applied to join multiple matching reads into their lowest common ancestor node in the taxonomic  
 191 tree.

### 192 2.2.1 K-mer counting lemma

193 The k-mer counting lemma can be defined as the minimum number of k-mer sequences of a read  
 194 that should match against reference k-mers in order to be considered present in a set with a certain  
 195 number of errors allowed. Given a read,  $R$ , with length  $l$ , the number of possible k-mers with length  
 196  $k$  in this read can be defined as:

$$kmers_R = l_R - k + 1 \quad (1)$$

197 An approximate occurrence of  $R$  in a set of references has to share at least

$$kcount_R = kmers_R - k \cdot e \quad (2)$$

198 k-mers, where  $e$  is the maximum number of errors/mismatches allowed.

### 199 2.2.2 Filtering

200 A read can be assigned to multiple references with different error rates, thus a filtering step is  
 201 necessary to decrease the number of false assignments. The applied k-mer counting lemma provides

202 k-mer counts for each read against the reference sequences. From this count it is possible to estimate  
203 the number of mismatches a read has. For example: for  $k = 19$  and  $length = 100$ , a read with 50  
204 19-mers matching a certain reference will optimally have 2 mismatches. This calculation can be  
205 achieved by solving the Equation 2 equation for  $e$ .

206 Assuming that reads with fewer mismatches have a higher chance of being correct, the following  
207 filtering is applied: first, only matches against references with no mismatches are kept (all k-mers  
208 matching). If there are no such assignments, matches with only 1 error are kept. If there are none,  
209 matches with only 2 errors are kept and so on up to the maximum number of errors allowed ( $e$  in  
210 Equation 2). Similar filtration methods (also known as mapping by strata) were previously used in  
211 read mappers such as Yara [19]. If a read is classified in several references within the same range  
212 of errors, they are all reported since it is not possible to define which one has a higher chance of  
213 being correct based on the k-mer count information. Given our clustering approach, some groups  
214 can share the same identification target (e.g. one species was split in two or more clusters due to  
215 a large amount of sequences). These cases are treated specially by reporting only the match with  
216 more k-mer similarities since they belong to the same classification group.

217 Ganon also provides a way to further filter the unique classifications with a different error  
218 rate for reads that matched against just one reference group. This filter will be applied after the  
219 standard filtration and will re-classify a low scored read to its parent taxonomic level if it scores  
220 below a certain threshold. This can be applied for filtering at low levels (e.g. assembly) since the  
221 classification in those levels should be more precise with less mismatches. This feature is also useful  
222 to avoid classifications that only happen due to a lack of related genomes (e.g. a low score match  
223 on the only representative species of a lineage).

224 In summary, ganon indices represent groups of reference sequences clustered by taxonomy or  
225 assembly group. All k-mers from the reads are extracted and compared against an index by  
226 applying the k-mer counting lemma to select candidates. This is done based on a user defined  
227 optimal number of errors. All matches within the error rate are filtered and one or more matches  
228 are reported. At the end, an optional LCA method can be applied for reads with multiple matches  
229 with a more conservative and less precise taxonomic classification, thus resulting in one match for  
230 each read. Additionally, ganon supports classification based on multiple indices in a user-defined  
231 hierarchy, with independent error rates for each index (Supplementary Material 1 - Section 2.4).

### 232 3 Results

233 We evaluated ganon against a set of well-established methods from recent benchmarks [3, 4, 6] that  
234 performs short read classification and supports indexing of large sets of reference sequences. The  
235 aim here is to compare in equal conditions the methods regarding input data, reference sequences  
236 and taxonomy. We compared ganon against kraken [15], one of the most used k-mer based methods  
237 for metagenomics short read classification. We also included krakenuniq [27], which uses the basic  
238 kraken algorithm and also allows classification on more specific levels after taxonomic assignments  
239 (e.g. up to assembly or sequence level). We further compare the results against centrifuge [28] that  
240 uses the Burrows-Wheeler transform (BWT) and the Full-text index in Minute space (FM-)index  
241 for indexing and aims to reduce the index size by compressing similar sequences together. Clark  
242 [29], another k-mer approach that uses common k-mers between reference sequences was also eval-  
243 uated. Diamond [30] an alignment tool for short DNA sequencing reads against protein reference  
244 databases was also included. Here we consider only the direct read classification capabilities of  
245 the tools. Further functionalities such as the estimation of a presence of a certain organism or  
246 abundance estimation were not covered. All steps performed in the evaluation were compiled in a  
247 benchmark pipeline (version 1.0.0) available from [https://github.com/pirovc/ganon\\_benchmark](https://github.com/pirovc/ganon_benchmark).

248 Ganon and the other evaluated tools are reference-based, meaning all classifications are made  
249 based on previously generated sequence data. The choice of the underlying database is therefore  
250 crucial. We use the same sequences and taxonomic database version for all tools when creating  
251 their indices to guarantee a fair comparison. The NCBI RefSeq repository was the chosen source  
252 of sequences since it provides a curated and very extensive set of references. Two subsets of RefSeq  
253 were extracted: a set of only complete genomes from the groups Archaea, Bacteria, Fungi and Viral  
254 (RefSeq-CG) and a complete set of all genomes from the same groups (RefSeq-ALL) both dating  
255 from 19-December-2018 (Table 1). Genomic DNA data was obtained for all tools. Protein sequence  
256 data from annotated genome assemblies was obtained for diamond (Supplementary Material 1 -  
257 Table 5). Taxonomic information was obtained at the same dates as the sequences. Additionally,

258 an old set of only Bacterial complete genomes from 02-June-2015 (RefSeq-OLD) was included to  
259 evaluate the tool's performance on an outdated and less diverse set of references.

|            | Base pairs      | # assemblies | # sequences |
|------------|-----------------|--------------|-------------|
| RefSeq-OLD | 9,632,441,987   | 3,042        | 5,242       |
| RefSeq-CG  | 46,986,899,184  | 19,623       | 33,029      |
| RefSeq-ALL | 587,607,072,429 | 147,713      | 15,201,684  |

Table 1: **Genomic DNA of reference sequences used for evaluations. Protein data information can be found in the Supplementary Material 1 - Table 5. Detailed information of each dataset can be found in the Supplementary Material 1 - Section 1.5.1. Data was downloaded using [https://github.com/pirovc/genome\\_updater](https://github.com/pirovc/genome_updater)**

260 The selected reference sets contain over-represented taxonomic groups with several assemblies  
261 for a single species. For example: the *Escherichia coli* species group is represented by 634 assem-  
262 blies, accounting for almost 7% of all base pairs in the RefSeq-CG. This is even more pronounced  
263 on RefSeq-ALL, with 13,259 *E. Coli* assemblies representing more than 11% of the base pairs in  
264 the whole set. In RefSeq-CG, the 92 most over-represented species have as many base pairs as  
265 the remaining 11,372 species. In RefSeq-ALL this ratio is 14 to 29,047 (Supplementary Material  
266 1 - Figure 1). This unbalanced distribution of references may not only bias analysis but also in-  
267 troduces redundancy to the set when aiming classification at taxonomic levels. Therefore, when  
268 not classifying at assembly level, we removed over-represented assemblies from our reference set,  
269 keeping only the 3 biggest assemblies of each taxonomic group (Table 2, Supplementary Material  
270 1 - Figure 2).

|                  | Base pairs   | # species     | # leaf taxids | # assemblies | # sequences     |
|------------------|--------------|---------------|---------------|--------------|-----------------|
| RefSeq-CG-top-3  | 2.9e10 (62%) | 11,464 (100%) | 14,071 (100%) | 15,171 (77%) | 24,290 (74%)    |
| RefSeq-ALL-top-3 | 2.1e11 (36%) | 29,061 (100%) | 51,292 (100%) | 56,805 (38%) | 4,400,402 (29%) |

Table 2: **Reference sequences after over-representation filtering.** Percentages in brackets show the amount of data left compared to the original set (Table 1). **Protein data information can be found in the Supplementary Material 1 - Table 5.**

271 For classification we used reads from the first CAMI Challenge [6]. Sets of simulated and real  
272 datasets mimicking commonly used environments and settings were obtained, representing multiple  
273 closely related strains, plasmid and viral sequences. These samples were divided into 3 categories:  
274 low, medium and high complexity with increasing number of organisms and different sequencing  
275 profiles providing a well-produced and challenging dataset to analyze. The simulated reads were  
276 generated based on public data (NCBI, SILVA46) and an exact ground truth assignment is provided  
277 for each read down to sequence level. The real dataset was obtained from newly sequenced genomes  
278 of 700 microbial isolates and 600 circular elements and a ground truth is provided at taxonomic  
279 levels. Here we used one high complexity sample from both categories to perform evaluations and  
280 benchmark the tools (Supplementary Material 1 - Table 6).

281 The classification results were evaluated in terms of sensitivity and precision in two different  
282 ways: cumulative- and rank-based. Details on their differences can be found in the Supplementary  
283 Material 1 - Section 1.7. In short, the cumulative-based evaluation will compare how well tools  
284 perform up to a certain taxonomic level, considering only the taxon of their final classification  
285 level. The rank-based evaluation considers the full lineage of each classification. For example:  
286 in a cumulative-based evaluation, values of sensitivity and precision at family level will account  
287 cumulatively for all sequences classified at subsequent taxonomic levels (genus, species, species+)  
288 up to (and including) the family level. In a rank-based evaluation, family level sensitivity and  
289 precision values are calculated based on the family assignment from the lineage of the classified  
290 sequences. The cumulative-based evaluation provides a better way to compare tools and their  
291 ability to correctly classify sequences to their targets. The rank-based approach will better compare  
292 how tools perform at a specific taxonomic level. In this work we will use both methodologies  
293 to compare the results of the evaluated methods. Additionally, we evaluated all scenarios with  
294 AMBER [31], an independent tool for assessment of metagenome bidders with a similar approach

295 to the rank-based evaluation. The complete cumulative-based, rank-based and amber results are  
 296 in the Supplementary Material 2.

297 The results for the CAMI simulated and real datasets should be interpreted considering the  
 298 depth of classification. Most tools classify at a certain taxonomic level, either specific rank (e.g.  
 299 species) or any taxon. Clark provides only species assignments and it was evaluated together with  
 300 all other tools providing results at any taxonomic level (centrifuge, diamond, ganon, and kraken).  
 301 Centrifuge, ganon and krakenuniq are also able to classify sequences at assembly level. Centrifuge  
 302 outputs at sequence level, thus an extra step of applying an LCA algorithm for non-unique matches  
 303 was necessary to generate results at assembly and taxonomic levels. Given the availability of the  
 304 ground truth, only simulated data was evaluated up to assembly level while real data was evaluated  
 305 at taxonomic levels.

### 306 3.1 Indexing

307 The set of reference sequences from RefSeq-OLD/CG/ALL (Table 1) and RefSeq-CG/ALL-top-3  
 308 (Table 2) were used as inputs to generate the indices for each evaluated tool. Here evaluation is  
 309 done by total run-time, memory consumption and final index size (Table 3 and 4).

| Reference        | Method     | time     | Memory | Index size |
|------------------|------------|----------|--------|------------|
| RefSeq-OLD       | centrifuge | 02:51:03 | 105    | 4          |
|                  | clark      | 04:07:56 | 161    | 35         |
|                  | diamond    | 00:08:07 | 30     | 3          |
|                  | ganon      | 00:02:08 | 24     | 16         |
|                  | kraken     | 02:04:16 | 93     | 79         |
| RefSeq-CG-top-3  | centrifuge | 06:51:25 | 269    | 12         |
|                  | clark      | 08:45:31 | 243    | 81         |
|                  | diamond    | 00:10:33 | 28     | 10         |
|                  | ganon      | 00:07:01 | 68     | 63         |
|                  | kraken     | 04:53:31 | 200    | 184        |
| RefSeq-ALL-top-3 | diamond    | 00:36:23 | 32     | 76         |
|                  | ganon      | 00:54:48 | 266    | 267        |

Table 3: **Build times, memory consumption and index sizes at taxonomic level.** Memory and Index size in GiB. All tools build at taxonomic leaf nodes (taxid) besides clark building at species level. Tools running more than 24 hours to build were not considered. 48 threads were used for all tools. Computer specifications and parameters used are in the Supplementary Material 1 - Section 1.1 and 1.4. Krakenuniq was not evaluated on taxonomic level since it runs exactly the same base algorithm as kraken in this configuration.

| Reference  | Method     | time     | Memory | Index size |
|------------|------------|----------|--------|------------|
| RefSeq-OLD | centrifuge | 02:51:03 | 105    | 4          |
|            | ganon      | 00:02:22 | 32     | 25         |
|            | krakenuniq | 02:06:41 | 93     | 79         |
| RefSeq-CG  | centrifuge | 12:32:08 | 459    | 21         |
|            | ganon      | 00:10:49 | 108    | 100        |
|            | krakenuniq | 08:54:56 | 345    | 204        |
| RefSeq-ALL | ganon      | 02:30:47 | 530    | 539        |

Table 4: **Build times, memory consumption and index sizes at assembly level.** Memory and Index size in GiB. Tools running more than 24 hours to build were not considered. 48 threads were used for all tools. Computer specifications and parameters used are in the Supplementary Material 1 - Section 1.1 and 1.4

310 When indexing the RefSeq-CG-top-3 at taxonomic levels (Table 3), the evaluated tools took  
 311 between 7 minutes and 8 hours, resulting in ganon being the fastest and clark the slowest. We do



312 not consider runs taking more than 24 hours to build indices, given that they clearly do not scale  
313 well enough to index high amounts of data and will not be able to keep indices up-to-date in a  
314 reasonable amount of time for new data (Supplementary Material 1 - Section 2.2). Ganon shows  
315 a significant overall reduction in memory consumption and run-time compared to the other tools  
316 besides diamond. However, diamond is the only tool using protein data, accounting approximately  
317 for a third of the volume of the genomic data. Ganon builds 41 times faster than kraken, the  
318 second fastest using the same data source. Centrifuge achieves the lowest index size with the  
319 cost of having the highest memory consumption. Additionally, ganon is able to generate smaller  
320 indices at the cost of speed in the classification step, without harming sensitivity. Ganon indices  
321 for RefSeq-CG-top-3 can be as small as 21GiB. RefSeq-ALL-top-3 was built in under an hour for  
322 diamond and ganon, with diamond providing a smaller filter and lower memory consumption. We  
323 could not run centrifuge, clark, kraken and krakenuniq for RefSeq-ALL on our infrastructure, given  
324 computational limitations or long execution time. A recent publication [11] reported that kraken  
325 and consequently krakenuniq both need 11 days to build a database for the bacterial RefSeq version  
326 80, an approximate of the RefSeq-ALL here evaluated, with a more powerful server consisting of  
327 64 cores of E7-8860v4 CPUs and three terabytes of memory. Estimated run times for these tools  
328 in the evaluated datasets can be found in the Supplementary Material 1 - Figure 6.

329 When building indices on assembly level (Table 4), ganon took around 10 minutes to index  
330 RefSeq-CG while the second fastest tool, krakenuniq, took almost 9 hours. Given our computa-  
331 tional and time limitations, ganon was the only tool able to build indices on assembly level for the  
332 RefSeq-ALL dataset, taking 2 hours and 30 minutes.

## 333 3.2 Updating

334 Ganon is the only tool among the evaluated ones that allows for incremental updates on previously  
335 generated indices. We evaluated this functionality on Bacterial sequences added to RefSeq-CG  
336 dating from 19-December-2018 to 21-January-2019, comprising 2.77 Gbp, 1307 sequences, 370  
337 species from which 213 are new to the reference set and 716 new assemblies (Supplementary  
338 Material 1 - Table 4). Updating the ganon index based on RefSeq-CG with this dataset finished  
339 under 5 minutes, less than half of the time necessary to create the index (Table 4).

## 340 3.3 Classifying

341 Figure 3 compares in a cumulative-based fashion the results of one simulated high complexity  
342 dataset (CAMI toy set) classified against the indices based on RefSeq-OLD, RefSeq-CG-top-3  
343 and RefSeq-ALL-top-3. In this analysis we can observe how each method performs classifying  
344 reads to their ground truth targets up to a certain taxonomic level. The overall improvement  
345 in terms of sensitivity and precision is clear when using a more complete and up-to-date set of  
346 references (RefSeq-ALL-top-3), since they provide higher coverage for the evaluated ground truth  
347 targets (Supplementary Material 1 - Figure 5). The highest F1-Score at any taxonomic level is  
348 achieved with ganon using RefSeq-ALL-top-3. Diamond shows an increase in performance at higher  
349 taxonomic levels but performs poorly at species level. Clark classifies only at species level and has  
350 no improvements in higher taxonomic levels. Metrics for the complete RefSeq-CG and RefSeq-ALL  
351 differ slightly from the respective top-3 sets, therefore they were not included in the evaluations  
352 (Supplementary Material 1 - Section 2.3.1). This indicates that over-representation filtering does  
353 not affect the results but it can speed up analysis.

354 When looking at the metrics by each rank individually (Table 5, Supplementary Material 1 -  
355 Figure 7), the overall precision and sensitivity values are greater, since incorrect classifications at  
356 lower levels are not penalized in this type of evaluation. Besides diamond, which underperforms  
357 at species level, all tools have overall similar performance values using RefSeq-OLD and RefSeq-  
358 CG-top-3. However, ganon shows improvement on sensitivity on all levels with RefSeq-ALL-top-3,  
359 being 12% more sensitive at species level and reaching 99.27% precision at genus level. For lower  
360 ranks (species and species+) results were mainly limited by the availability of reference sequences  
361 (Supplementary Material 1 - Figure 5).

362 The same analysis was performed on real data (CAMI challenge set). This set is more challeng-  
363 ing since most of the species in the sample are novel and, still to this date, mostly not present in  
364 the analyzed repositories of reference sequences (Supplementary Material 1 - Figure 5). As stated  
365 by the CAMI results [6], tools performed poorly in this dataset in terms of sensitivity (Figure 4).  
366 Here the impact of a larger and up-to-date set of references (RefSeq-ALL-top-3) is more evident,

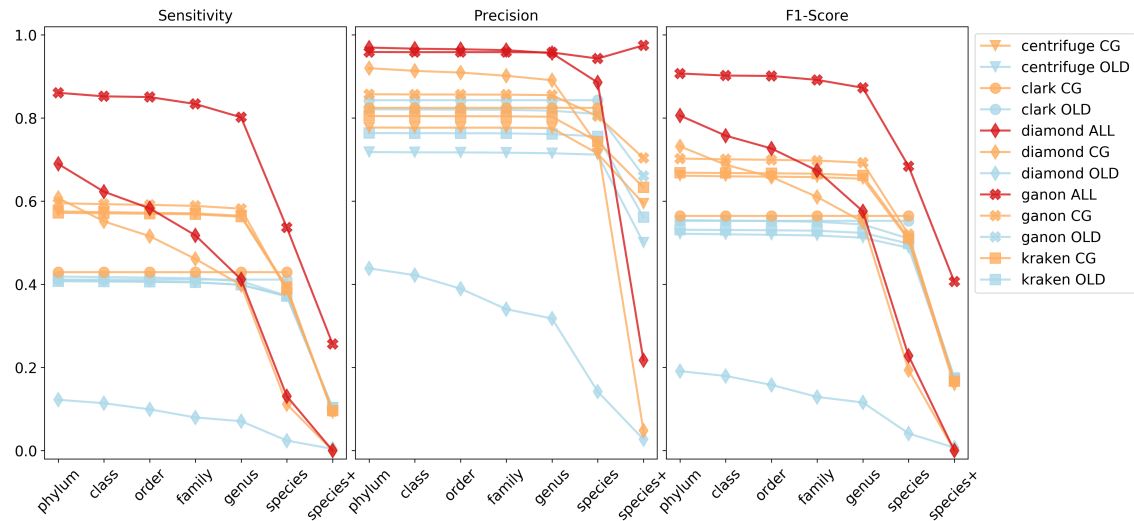

Figure 3: **Cumulative-based precision, sensitivity and F1-Score for the simulated reads.** Colors represent different reference sets: blue = RefSeq-OLD, orange = RefSeq-CG-top-3, red = RefSeq-ALL-top-3

| Reference        | Method     | Sensitivity   | Precision     | F1-Score      |
|------------------|------------|---------------|---------------|---------------|
| RefSeq-OLD       | centrifuge | 41.49%        | 79.60%        | 54.55%        |
|                  | clark      | 41.13%        | 84.29%        | 55.29%        |
|                  | diamond    | 4.96%         | 29.30%        | 8.49%         |
|                  | ganon      | 40.78%        | 88.68%        | 55.87%        |
|                  | kraken     | 41.23%        | 83.92%        | 55.30%        |
| RefSeq-CG-top-3  | centrifuge | 43.57%        | 79.12%        | 56.19%        |
|                  | clark      | 42.93%        | 82.43%        | 56.45%        |
|                  | diamond    | 11.30%        | 74.41%        | 19.62%        |
|                  | ganon      | 41.86%        | 87.56%        | 56.64%        |
|                  | kraken     | 43.14%        | 82.32%        | 56.61%        |
| RefSeq-ALL-top-3 | diamond    | 13.10%        | 88.64%        | 22.82%        |
|                  | ganon      | <b>53.99%</b> | <b>94.91%</b> | <b>68.83%</b> |

Table 5: **Rank-based precision, sensitivity and F1-Score values for the simulated reads at species level** The use of a larger reference set with RefSeq-ALL-top-3 significantly improves results. Only ganon and diamond indexed the RefSeq-ALL-top-3 in less than 24 hours. Highlighted values for the best results with this dataset at species level. Results for all taxonomic levels are in the Supplementary Material 1 - Figure 7 and Supplementary Material 2

367 thus significantly improving the results on both sensitivity and precision. The same trend from  
 368 the simulated data analysis is present, with ganon achieving best results up to species level and  
 369 diamond improving classifications at higher levels but having poor resolution at lower ranks.

370 In the rank-based analysis (Table 6, Supplementary Material 1 - Figure 8) ganon has 10% higher  
 371 F1-Score compared to diamond with the RefSeq-ALL-top-3 as species level. Sensitivity has a peak  
 372 of 10% and 25% at species+ and species levels, respectively, which are not far from the maximum  
 373 possible using this reference set (12% and 32% respectively). Similar results can be seen in amber  
 374 evaluation (Figure 5). Comparing results between RefSeq-CG-top-3 and RefSeq-ALL-top-3, genus  
 375 level sensitivity went from 13% to 83% with a significant improvement in precision, reinforcing the  
 376 need for bigger and more diverse reference sets to analyze metagenomics data.

377 Table 7 compares the assembly level classification between centrifuge, ganon and krakenuniq.  
 378 There is an overall decrease in precision and sensitivity from RefSeq-OLD to RefSeq-CG. Precision  
 379 is greater using RefSeq-ALL but sensitivity is still greater with RefSeq-OLD. However, RefSeq-CG  
 380 has more than 6 times the number of assemblies of RefSeq-OLD, while RefSeq-ALL has almost 50  
 381 times more assemblies (Table 1). As reported before [11], higher diversity in the references does

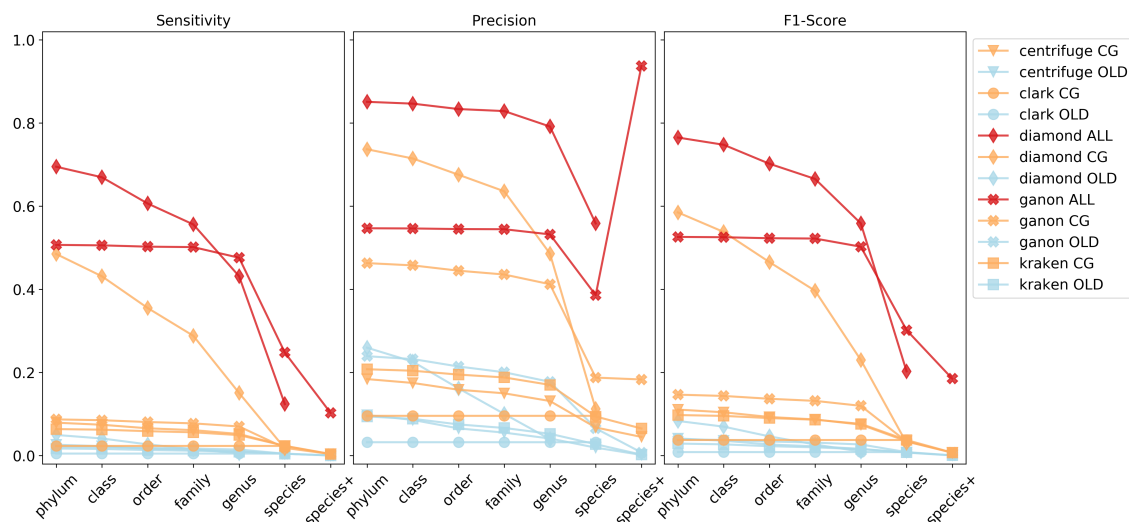

Figure 4: **Cumulative-based precision, sensitivity and F1-Score for the real reads.** Colors represent different reference sets: blue = RefSeq-OLD, orange = RefSeq-CG-top-3, red = RefSeq-ALL-top-3

| Reference        | Method     | Sensitivity   | Precision     | F1-Score      |
|------------------|------------|---------------|---------------|---------------|
| RefSeq-OLD       | centrifuge | 0.51%         | 2.24%         | 0.84%         |
|                  | clark      | 0.49%         | 3.21%         | 0.86%         |
|                  | diamond    | 0.00%         | 0.00%         | 0.00%         |
|                  | ganon      | 0.45%         | 6.68%         | 0.85%         |
|                  | kraken     | 0.50%         | 3.13%         | 0.86%         |
| RefSeq-CG-top-3  | centrifuge | 2.41%         | 7.03%         | 3.59%         |
|                  | clark      | 2.34%         | 9.57%         | 3.76%         |
|                  | diamond    | 1.74%         | 11.23%        | 3.02%         |
|                  | ganon      | 1.89%         | 19.14%        | 3.44%         |
|                  | kraken     | 2.39%         | 9.61%         | 3.83%         |
| RefSeq-ALL-top-3 | diamond    | 12.38%        | <b>55.84%</b> | 20.27%        |
|                  | ganon      | <b>25.03%</b> | 38.97%        | <b>30.48%</b> |

Table 6: **Rank-based precision, sensitivity and F1-Score values for the real reads at species level.** The use of a larger reference set with RefSeq-ALL-top-3 significantly improves results. Only ganon and diamond indexed the RefSeq-ALL-top-3 in less than 24 hours. Highlighted values for the best results with this dataset at species level. Results for all taxonomic levels are in the Supplementary Material 1 - Figure 8 and Supplementary Material 2

382 not always translate to an improved accuracy in the classification. This was also noticed when  
 383 using the complete NCBI-nt database to analyze the same dataset (Supplementary Material 1 -  
 384 Figure 13).

385 In the specific case of methods evaluated here, small differences between very similar assemblies  
 386 are difficult to be identified due to the resolution of each method. This means that they, in general,  
 387 can correctly classify sequences to target assemblies given a certain similarity threshold. However,  
 388 they are unable to select the correct assembly, thus providing the lowest common ancestor at a lower  
 389 resolution. This can be seen in Supplementary Material 1 - Figure 12, where the overall sensitivity  
 390 and precision of all tools executing in assembly mode did not affect the taxonomic metrics and are  
 391 comparable to the same tools running in taxonomic mode. Even though the assembly step does  
 392 not provide accurate enough results, centrifuge and ganon are the only tools that can provide a  
 393 list of all matches/candidates that can be further analyzed with high resolution methods [32].

394 In most scenarios evaluated, ganon consistently provides greater precision classifying reads to  
 395 their ground truth targets within the same reference set, while keeping sensitivity values high, with  
 396 little variation to the other methods. High precision translates to fewer reads with a wrong clas-

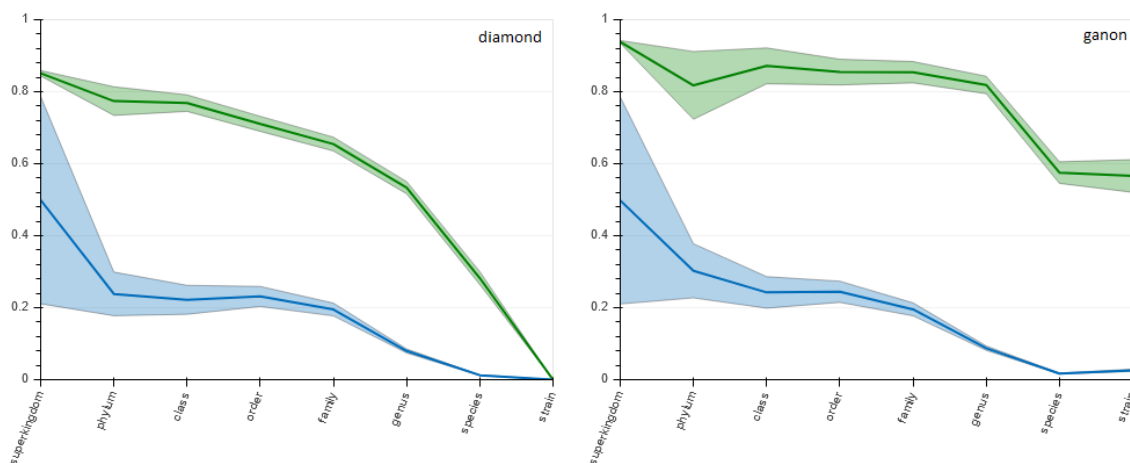

Figure 5: **AMBER completeness/sensitivity (green) and purity/precision (blue) values for real reads.** Results for diamond (left) and ganon (right) using RefSeq-ALL-top-3 set of references. Strain level in AMBER plots are equivalent to species+ in our evaluations.

| Reference  | Method     | Sensitivity   | Precision     | F1-Score      |
|------------|------------|---------------|---------------|---------------|
| RefSeq-OLD | centrifuge | <b>22.78%</b> | 64.54%        | 33.68%        |
|            | ganon      | 22.32%        | 77.95%        | <b>34.70%</b> |
|            | krakenuniq | 22.68%        | 69.66%        | 34.22%        |
| RefSeq-CG  | centrifuge | 11.82%        | 30.77%        | 17.08%        |
|            | ganon      | 11.52%        | 37.25%        | 17.60%        |
|            | krakenuniq | 11.67%        | 32.45%        | 17.17%        |
| RefSeq-ALL | ganon      | 21.56%        | <b>87.89%</b> | 34.62%        |

Table 7: **Rank-based precision, sensitivity and F1-Score values for the simulated reads at assembly level.** Only ganon indexed the RefSeq-ALL in less than 24 hours. Highlighted values for the best results with this dataset at assembly level. Results for all taxonomic levels are in the Supplementary Material 2.

397 sification. Sensitivity is strongly improved in more diverse reference sets, especially with RefSeq-  
 398 ALL-top-3. Looking at rank-by-rank performance, ganon improved F1-Score in every taxonomic  
 399 rank (Supplementary Material 1 - Figures 7 and 8), with F1-Score up to 46% higher than diamond  
 400 with the same reference at species level (Table 5).

401 Table 8 compares the performance of the analyzed tools in terms of how many base pairs they  
 402 can classify per minute (Mbp/m), wall/elapsed time and memory usage. Kraken is the tool with  
 403 the fastest runtime on classification step and diamond with the slowest. Although comparisons  
 404 with diamond were made, it is important to notice that the tool works in a very different way using  
 405 protein data and performing alignments, thus explaining the huge difference in execution times.  
 406 Ganon can be configured to run in *offset* mode, thus skipping a certain number of k-mers and  
 407 speeding up classification. *offset* = 1 means that all k-mers are being evaluated while *offset* = 2  
 408 means that every 2nd k-mer is being skipped. The trade-off between offset and precision/sensitivity  
 409 for ganon results can be seen in Supplementary Material 1 - Figure 11. Speed variation between  
 410 simulated and real reads is partly explained due to their classification rate: on average 70% of the  
 411 simulated reads are classified while only 20% of the real reads are classified. Memory consumption  
 412 is mainly based on the index size of each tool (Table 3), with little variation besides that.

## 413 4 Discussion

414 We presented ganon, a novel method to index big sets of genomic sequences and classify short  
 415 reads against them in a taxonomic oriented scheme. Ganon's strengths are an ultra-fast indexing  
 416 method for large sets of reference sequences that incorporates a novel application of Interleaved

| Reference        | Method     | Simulated |                        |        | Real  |                        |        |
|------------------|------------|-----------|------------------------|--------|-------|------------------------|--------|
|                  |            | Mbp/m     | Wall time              | Memory | Mbp/m | Wall time              | Memory |
| RefSeq-CG-top-3  | centrifuge | 298       | 00:24:59 ( $\pm$ 51s)  | 14     | 802   | 00:09:19 ( $\pm$ 4s)   | 14     |
|                  | clark      | 1104      | 00:06:44 ( $\pm$ 5s)   | 108    | 1208  | 00:06:11 ( $\pm$ 4s)   | 107    |
|                  | diamond    | 36        | 03:27:00 ( $\pm$ 259s) | 15     | 33    | 03:40:55 ( $\pm$ 170s) | 16     |
|                  | ganon      | 406       | 00:44:05 ( $\pm$ 54s)  | 65     | 573   | 00:14:19 ( $\pm$ 6s)   | 65     |
|                  | kraken     | 2113      | 00:03:46 ( $\pm$ 1s)   | 190    | 2734  | 00:02:57 ( $\pm$ 3s)   | 190    |
| RefSeq-ALL-top-3 | diamond    | 6         | 18:23:09 ( $\pm$ 729)  | 23     | 5     | 21:23:00 ( $\pm$ 181s) | 23     |
|                  | ganon      | 115       | 04:42:32 ( $\pm$ 216s) | 261    | 163   | 00:49:11 ( $\pm$ 12s)  | 261    |

Table 8: **Classification performance.** Memory in GiB. Full set of simulated and real reads classified with 48 threads. Centrifuge, clark and diamond performance in Mbp/m calculated from wall time. Values are the average of 4 out of 5 consecutive runs (excluding the slowest run), with standard deviation for the run time in parentheses. Computer specifications and parameters used are in the Supplementary Material 1 - Section 1.1 and 1.4

417 Bloom Filters and a precise classification with k-mer counting and filtering. Unlike DREAM-  
418 Yara, an alignment-based read mapper that uses the IBF as a pre-filter for the distributed Yara  
419 mapper, ganon uses the IBF as the main index structure to provide an alignment-free assignment  
420 of sequences. This is only possible by creating taxonomic constrained clusters with TaxSBP in  
421 any desired taxonomic level. Ganon additionally applies an LCA algorithm as a final step to have  
422 one classification per sequence. In addition it also provides updatability of indices, multi-hierarchy  
423 support for classification, assembly level support and taxonomic reports.

424 By indexing large sets of reference sequences and turn them into searchable indices, ganon allows  
425 scientists to make most of their data. Short turnaround times for index building and updating  
426 are crucial for many bioinformatics applications (e.g. outbreak investigation). In our evaluations,  
427 building the complete RefSeq and classifying 49 million reads against it performed under 2 hours  
428 with ganon, from raw reference sequences and reads to taxonomic reports, while diamond required  
429 more than 22 hours to classify the same set. Other methods required at least 24 hours to build the  
430 indices. Without a dedicated infrastructure for constant reconstruction of indices and databases,  
431 tools evaluated in this work are unable to keep up with the fast growing rate of reference sequence  
432 repositories. That results in either long time to start analysis or use of outdated reference sets.  
433 Ganon facilitates database maintenance, allowing short increments on a daily basis being the only  
434 realistic option to keep-up with the fast pace of data generation. In addition, ganon indices are  
435 flexible and can be built for different taxonomic levels (e.g. genus), requiring less space and memory,  
436 consequently improving classification speed. A trade-off between filter size, clustering and false  
437 positive rate is also possible, simply by sacrificing precision over performance or disk usage over  
438 classification speed.

439 Classification results presented here are on par with state-of-the-art methods with regards  
440 to sensitivity, while improving precision rates in almost every scenario of our cumulative-based  
441 evaluations. Results are consistent across all three evaluation methods (cumulative- and rank-  
442 based and amber) indicating the robustness of findings. We attribute this improvement to an  
443 application of the k-mer counting lemma together with a progressive filtering step, which can  
444 better separate false from true positives. The unique filtering step also allows for better selection  
445 of false positives when taxonomic groups are underrepresented in the reference set. In addition,  
446 instead of only reporting reads at a fixed LCA level, ganon provides every output for a read at a  
447 taxonomic or assembly level. This is crucial for strain level analysis, where candidate organisms  
448 are more insightful for further investigations than a conservative identification.

449 Even with ganon achieving improved results in classification, in general terms, the methods  
450 tested here perform similarly when based on the same underlying set of reference sequences. The  
451 difference in sensitivity when using a high quality set (RefSeq-ALL) compared to only complete  
452 genomes (RefSeq-CG) or an outdated set (RefSeq-OLD) is very significant and tends to get bigger  
453 with more sequences added to this repository. Thus the choice of the database is crucial and should  
454 not be overlooked when analyzing metagenomics data. Even though centrifuge, clark, kraken and  
455 krakenuniq could potentially perform well with more reference sequences, their indexing times are  
456 highly prohibitive.

457 When using highly diverse reference sets or when aiming at high resolution classification (e.g.  
458 assembly level), the evaluated methods shown decreased performance. However, in a scenario of

459 data exploration of an unknown environmental sample, the ability to classify reads against huge  
460 sets of very diverse reference sequences (e.g. NCBI-nt) can be helpful. Therefore, in those scenarios  
461 we recommend to perform analysis hierarchically, first classifying reads against high quality ref-  
462 erences and only using high diverse reference sets for unclassified sequences, adjusting error rates  
463 accordingly. This approach can be easily done with ganon’s implementation of multi-filter and  
464 multi-hierarchy classification. This functionality tied to fast indexing of reference sets make ganon  
465 a powerful tool for exploratory data analysis, enabling multiple combinations of indices and error  
466 rates in an iterative manner. An example of this functionality can be found in Supplementary  
467 Material 1 - Section 2.4, where we analyzed real data from TARA oceans [10], building several  
468 indices and classifying reads against them in an exploratory-fashion.

469 Ganon’s fast indexing performance is mainly due to the fact that k-mers are not being counted.  
470 Instead, all of them are inserted into a space-efficient data structure (IBF) that also provides  
471 quick look-up times. However, data generation is constantly increasing and in the long term this  
472 approach will reach a limit. For that reason, a k-mer aware clustering combined with a minimizer  
473 implementation could improve performance in the data structure as well as memory consumption.  
474 These features are planned for future releases. Even though we based our analysis on large and  
475 realistic datasets, time efficiency purely based on data can be misleading. Thus, the scalability of  
476 the methods can only be deduced. As a future work we propose a comparison of time and space  
477 complexities of each methodology and how they would perform in the long term, considering a  
478 continuous and exponential data growth.

479 Ganon manages to index large sets of reference sequences while keeping them updated in very  
480 short time. In addition, classification results for ganon are as good as or better than the evaluated  
481 tools and it runs in competitive time. To the best of our knowledge, ganon is the only tool with  
482 update capabilities, which is performed in a fraction of the complete build time. This poses as an  
483 advantage to maintain up to date with the public repositories of genomic data and their frequent  
484 updates. To conclude, we believe that ganon can be a useful tool for metagenomics analysis in a  
485 time where reference sequence repositories are growing fast.

## 486 5 Acknowledgments

487 We would like to thank Tobias Loka for helpful discussions, Diogo Andrei Benvenuti for git  
488 project improvements and C++ contributions, Robert Rentzsch and Elizabeth Yuu for revising  
489 the manuscript.

## 490 6 Author contributions

491 V.C.P. designed, implemented and tested the tool and the experiments and wrote the manuscript.  
492 T.H.D. created and implemented the IBF and reviewed the manuscript. E.S. improved and tested  
493 the IBF and reviewed the manuscript. K.R. and B.Y.R. designed and supervised the project,  
494 discussed the experiments and reviewed the manuscript. All authors read and approved the final  
495 manuscript.

## 496 7 Funding

497 This work was supported by the Coordenação de Aperfeiçoamento de Pessoal de Nível Superior  
498 (CAPES) - Ciência sem Fronteiras (BEX 13472/13-5 to VCP), by the BMBF (InfectControl 2020)  
499 and by the BMBF-funded de.NBI Cloud within the German Network for Bioinformatics Infrastruc-  
500 ture (de.NBI) (031A537B, 031A533A, 031A538A, 031A533B, 031A535A, 031A537C, 031A534A,  
501 031A532B).

## 502 References

503 [1] Simon H Tausch, Benjamin Strauch, Andreas Andrusch, Tobias P Loka, Martin S Lindner,  
504 Andreas Nitsche, and Bernhard Y Renard. LiveKraken—real-time metagenomic classification  
505 of illumina data. *Bioinformatics*, June 2018. arXiv: 103549.

- 506 [2] Anastasis Oulas, Christina Pavludi, Paraskevi Polymenakou, Georgios A. Pavlopoulos, Niko-  
507 las Papanikolaou, Georgios Kotoulas, Christos Arvanitidis, and Ioannis Iliopoulos. Metage-  
508 nomics: Tools and Insights for Analyzing Next-Generation Sequencing Data Derived from  
509 Biodiversity Studies. *Bioinformatics and Biology Insights*, 9:BBI.S12462, January 2015.
- 510 [3] Alexa B. R. McIntyre, Rachid Ounit, Ebrahim Afshinnekoo, Robert J. Prill, Elizabeth Hénaff,  
511 Noah Alexander, Samuel S. Minot, David Danko, Jonathan Foox, Sofia Ahsanuddin, Scott  
512 Tighe, Nur A. Hasan, Poorani Subramanian, Kelly Moffat, Shawn Levy, Stefano Lonardi, Nick  
513 Greenfield, Rita R. Colwell, Gail L. Rosen, and Christopher E. Mason. Comprehensive bench-  
514 marking and ensemble approaches for metagenomic classifiers. *Genome Biology*, 18(1):182,  
515 December 2017. Publisher: Genome Biology.
- 516 [4] Stinus Lindgreen, Karen L. Adair, and Paul P. Gardner. An evaluation of the accuracy and  
517 speed of metagenome analysis tools. *Scientific Reports*, 6(1):19233, May 2016.
- 518 [5] Michael A. Peabody, Thea Van Rossum, Raymond Lo, and Fiona S. L. Brinkman. Evaluation  
519 of shotgun metagenomics sequence classification methods using in silico and in vitro simulated  
520 communities. *BMC Bioinformatics*, 16(1):362, December 2015.
- 521 [6] Alexander Sczyrba, Peter Hofmann, Peter Belmann, David Koslicki, Stefan Janssen, Johannes  
522 Dröge, Ivan Gregor, Stephan Majda, Jessika Fiedler, Eik Dahms, Andreas Bremges, Adrian  
523 Fritz, Ruben Garrido-Oter, Tue Sparholt Jørgensen, Nicole Shapiro, Philip D Blood, Alexey  
524 Gurevich, Yang Bai, Dmitrij Turaev, Matthew Z DeMaere, Rayan Chikhi, Niranjana Nagara-  
525 jan, Christopher Quince, Fernando Meyer, Monika Balvočiūtė, Lars Hestbjerg Hansen, Søren J  
526 Sørensen, Burton K H Chia, Bertrand Denis, Jeff L Froula, Zhong Wang, Robert Egan, Dong-  
527 wan Don Kang, Jeffrey J Cook, Charles Deltel, Michael Beckstette, Claire Lemaitre, Pierre  
528 Peterlongo, Guillaume Rizk, Dominique Lavenier, Yu-Wei Wu, Steven W Singer, Chirag Jain,  
529 Marc Strous, Heiner Klingenberg, Peter Meinicke, Michael D Barton, Thomas Lingner, Hsin-  
530 Hung Lin, Yu-Chieh Liao, Genivaldo Gueiros Z. Silva, Daniel A Cuevas, Robert A Edwards,  
531 Surya Saha, Vitor C Piro, Bernhard Y Renard, Mihai Pop, Hans-Peter Klenk, Markus Göker,  
532 Nikos C Kyrpides, Tanja Woyke, Julia A Vorholt, Paul Schulze-Lefert, Edward M Rubin,  
533 Aaron E Darling, Thomas Rattei, and Alice C McHardy. Critical Assessment of Metagenome  
534 Interpretation—a benchmark of metagenomics software. *Nature Methods*, 14(11):1063–1071,  
535 October 2017.
- 536 [7] Monika Balvočiūtė and Daniel H. Huson. SILVA, RDP, Greengenes, NCBI and OTT — how  
537 do these taxonomies compare? *BMC Genomics*, 18(S2):114, March 2017.
- 538 [8] Donovan H. Parks, Christian Rinke, Maria Chuvochina, Pierre-Alain Chaumeil, Ben J. Wood-  
539 croft, Paul N. Evans, Philip Hugenholtz, and Gene W. Tyson. Recovery of nearly 8,000  
540 metagenome-assembled genomes substantially expands the tree of life. *Nature Microbiology*,  
541 2(11):1533–1542, November 2017. Publisher: Springer US ISBN: 4156401700127.
- 542 [9] Supratim Mukherjee, Rekha Seshadri, Neha J Varghese, Emiley A Eloë-Fadrosch, Jan P Meier-  
543 Kolthoff, Markus Göker, R Cameron Coates, Michalis Hadjithomas, Georgios A Pavlopoulos,  
544 David Paez-Espino, Yasuo Yoshikuni, Axel Visel, William B Whitman, George M Garrity,  
545 Jonathan A Eisen, Philip Hugenholtz, Amrita Pati, Natalia N Ivanova, Tanja Woyke, Hans-  
546 Peter Klenk, and Nikos C Kyrpides. 1,003 reference genomes of bacterial and archaeal isolates  
547 expand coverage of the tree of life. *Nature Biotechnology*, 35(7):676–683, June 2017. Publisher:  
548 Nature Publishing Group.
- 549 [10] Benjamin J Tully, Elaina D Graham, and John F Heidelberg. The reconstruction of 2,631 draft  
550 metagenome-assembled genomes from the global oceans. *Scientific Data*, 5:170203, January  
551 2018.
- 552 [11] Daniel J. Nasko, Sergey Koren, Adam M. Phillippy, and Todd J. Treangen. RefSeq database  
553 growth influences the accuracy of k-mer-based lowest common ancestor species identification.  
554 *Genome Biology*, 19(1), December 2018.
- 555 [12] Dennis A. Benson, Mark Cavanaugh, Karen Clark, Ilene Karsch-Mizrachi, James Ostell,  
556 Kim D. Pruitt, and Eric W. Sayers. GenBank. *Nucleic Acids Research*, 46(D1):D41–D47,  
557 January 2018.

- 558 [13] Daniel H. Haft, Michael DiCuccio, Azat Badretdin, Vyacheslav Brover, Vyacheslav Chetvernin,  
559 Kathleen O'Neill, Wenjun Li, Farideh Chitsaz, Myra K. Derbyshire, Noreen R. Gonzales,  
560 Marc Gwadz, Fu Lu, Gabriele H. Marchler, James S. Song, Narmada Thanki, Roxanne A.  
561 Yamashita, Chanjuan Zheng, Françoise Thibaud-Nissen, Lewis Y. Geer, Aron Marchler-Bauer,  
562 and Kim D. Pruitt. RefSeq: an update on prokaryotic genome annotation and curation.  
563 *Nucleic Acids Research*, 46(D1):D851–D860, January 2018.
- 564 [14] Florian P. Breitwieser, Jennifer Lu, and Steven L. Salzberg. A review of methods and databases  
565 for metagenomic classification and assembly. *Briefings in Bioinformatics*, September 2017.
- 566 [15] Derrick E Wood and Steven L Salzberg. Kraken: ultrafast metagenomic sequence classification  
567 using exact alignments. *Genome Biology*, 15(3):R46, March 2014.
- 568 [16] Xin Li, Saleh A Naser, Annette Khaled, Haiyan Hu, and Xiaoman Li. When old metagenomic  
569 data meet newly sequenced genomes, a case study. *PLOS ONE*, 13(6):e0198773, June 2018.
- 570 [17] Duy Tin Truong, Eric A. Franzosa, Timothy L. Tickle, Matthias Scholz, George Weingart,  
571 Edoardo Pasolli, Adrian Tett, Curtis Huttenhower, and Nicola Segata. MetaPhlan2 for en-  
572 hanced metagenomic taxonomic profiling. *Nature Methods*, 12(10):902–903, October 2015.  
573 arXiv: 1312.0570v2 Publisher: Nature Publishing Group, a division of Macmillan Publishers  
574 Limited. All Rights Reserved. ISBN: 1548-7091.
- 575 [18] Peter Menzel, Kim Lee Ng, and Anders Krogh. Fast and sensitive taxonomic classification for  
576 metagenomics with Kaiju. *Nature Communications*, 7:11257, April 2016. Publisher: Nature  
577 Publishing Group.
- 578 [19] Temesgen Hailemariam Dadi, Enrico Siragusa, Vitor C Piro, Andreas Andrusch, Enrico Seiler,  
579 Bernhard Y Renard, and Knut Reinert. DREAM-Yara: an exact read mapper for very large  
580 databases with short update time. *Bioinformatics*, 34(17):i766–i772, September 2018.
- 581 [20] Knut Reinert, Temesgen Hailemariam Dadi, Marcel Ehrhardt, Hannes Hauswedell, Svenja  
582 Mehringer, René Rahn, Jongkyu Kim, Christopher Pockrandt, Jörg Winkler, Enrico Siragusa,  
583 Gianvito Urgese, and David Weese. The SeqAn C++ template library for efficient sequence  
584 analysis: A resource for programmers. *Journal of Biotechnology*, 261(July):157–168, November  
585 2017.
- 586 [21] Daniel H Huson, Alexander F Auch, Ji Qi, and Stephan C Schuster. MEGAN analysis of  
587 metagenomic data. *Genome Research*, 17(3):377–386, February 2007.
- 588 [22] Burton H. Bloom. Space/time trade-offs in hash coding with allowable errors. *Communications*  
589 *of the ACM*, 13(7):422–426, 1970. arXiv: 1011.1669v3 ISBN: 0001-0782.
- 590 [23] Scott Federhen. The NCBI Taxonomy database. *Nucleic Acids Research*, 40(D1):D136–D143,  
591 January 2012.
- 592 [24] Bruno Codenotti, Gianluca De Marco, Mauro Leoncini, Manuela Montangero, and Massimo  
593 Santini. Approximation algorithms for a hierarchically structured bin packing problem. *In-*  
594 *formation Processing Letters*, 89(5):215–221, March 2004.
- 595 [25] Petteri Jokinen and Esko Ukkonen. Two algorithms for approximate string matching in static  
596 texts. In Andrzej Tarlecki, editor, *Mathematical Foundations of Computer Science 1991*,  
597 Lecture Notes in Computer Science, pages 240–248. Springer Berlin Heidelberg, 1991.
- 598 [26] Knut Reinert, Ben Langmead, David Weese, and Dirk J Evers. Alignment of Next-Generation  
599 Sequencing Reads. *Annual Review of Genomics and Human Genetics*, 16(1):133–151, August  
600 2015. ISBN: 1527-8204.
- 601 [27] F. P. Breitwieser, D. N. Baker, and S. L. Salzberg. KrakenUniq: confident and fast metage-  
602 nomics classification using unique k-mer counts. *Genome Biology*, 19(1), December 2018.
- 603 [28] Daehwan Kim, Li Song, Florian P Breitwieser, and Steven L Salzberg. Centrifuge: rapid  
604 and sensitive classification of metagenomic sequences. *Genome Research*, 26(12):1721–1729,  
605 December 2016.



- 606 [29] Rachid Ounit, Steve Wanamaker, Timothy J Close, and Stefano Lonardi. CLARK: fast and  
607 accurate classification of metagenomic and genomic sequences using discriminative k-mers.  
608 *BMC Genomics*, 16(1):236, December 2015.
- 609 [30] Benjamin Buchfink, Chao Xie, and Daniel H. Huson. Fast and sensitive protein alignment  
610 using DIAMOND. *Nature Methods*, 12(1):59–60, January 2015.
- 611 [31] Fernando Meyer, Peter Hofmann, Peter Belmann, Ruben Garrido-Oter, Adrian Fritz, Alexan-  
612 der Sczyrba, and Alice C. McHardy. AMBER: Assessment of Metagenome BinnerS. *Giga-  
613 Science*, 7(6), June 2018.
- 614 [32] Martina Fischer, Benjamin Strauch, and Bernhard Y Renard. Abundance estimation and  
615 differential testing on strain level in metagenomics data. *Bioinformatics*, 33(14):i124–i132,  
616 July 2017.
